# Supplementary material
Source: publisher figshare collection journal article supplement (https://tandf.figshare.com/ndownloader/files/17337806)
Supplement: Supplementary file 1 [file 17337806]

Supplementary Table 7. Effects of bentonite addition and *A*. *sessilis* cultivation on residual PCBi concentrations (ng g-1) in the soil containing 1200 ng ƩPCBi g-1 after 13 weeks of incubation.

| PCBi | without plant cultivation | | | With alternanthra cultivation | | |
| --- | --- | --- | --- | --- | --- | --- |
| **B0***  **(Control)** | **B2** | **B4** | **B0** | **B2** | **B4** |
| CB5 | 11.9 a | 11.2 a | 11.0 a | 12.0 a | 11.2 a | 8.64b |
| CB18 | 12.9 a | 13.4 a | 13.0 a | 13.8 b | 13.5 b | 8.05c |
| CB31 | 32.2 a | 31.8 a | 30.8 a | 25.0 b | 21.4 c | 14.6 d |
| CB44 | 20.9 a | 19.7 a | 20.0 a | 16.2 b | 14.6 c | 11.4 d |
| CB52 | 6.38 a | 6.20 a | 6.77 a | 7.77 a | 7.04 a | 4.38 b |
| CB66 | 37.7 a | 37.4 a | 36.5 a | 30.8 b | 27.1 c | 24.5 d |
| CB87 | 124.5 a | 125.8 a | 128.2 a | 80.9 b | 63.5 c | 53.1 d |
| CB101 | 18.5 a | 18.0 a | 17.6 a | 12.0 b | 10.2 c | 7.24 d |
| CB110 | 61.3 a | 62.0 a | 61.3 a | 47.5 b | 39.3 c | 34.1 d |
| CB138 | 53.8 a | 44.9 b | 49.5 b | 44.3 b | 38.3 c | 29.3 d |
| CB141 | 222.1 a | 216.7 a | 218.8 a | 213.2 a | 173.5 b | 144.5 c |
| CB151 | 47.1 a | 46.5 a | 44.8 a | 43.1 a | 31.9 b | 22.6 c |
| CB153 | 57.4 a | 55.2 a | 56.2 a | 44.5b | 37.6 c | 30.6 d |
| CB170 | 56.5 a | 52.2 a | 51.5 a | 40.3 b | 33.2 c | 26.6 d |
| CB180 | 39.9 a | 38.7 a | 39.5 a | 33.3 a | 28.7 b | 25.4 c |
| CB183 | 129.3 a | 127.7 a | 127.5 a | 147.8 a | 117.2 b | 99.1 c |
| CB187 | 64.6 a | 63.2 a | 64.4 a | 59.6 b | 55.7 b | 46.1 c |

Different letters in each row represent signiﬁcant differences with Tukey test (P< 0.05).

*: B0: 0% bentonite, B2: 2% bentonite, B4: 4% bentonite
